# Supplementary material
Source: PubMed Central journal article supplement (PMC4242715)

Appendix 1

1

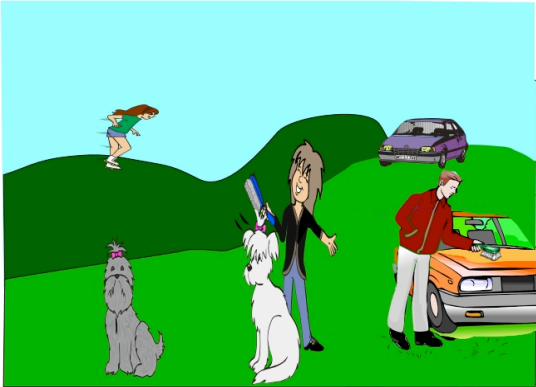

2

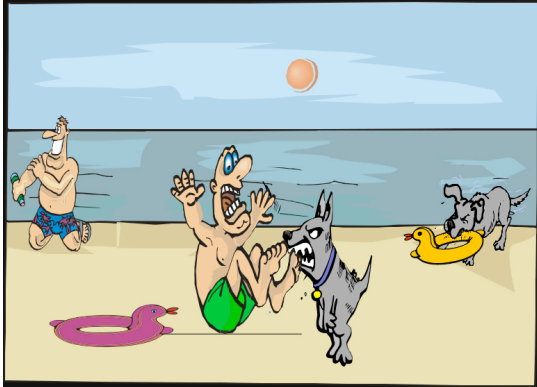

3

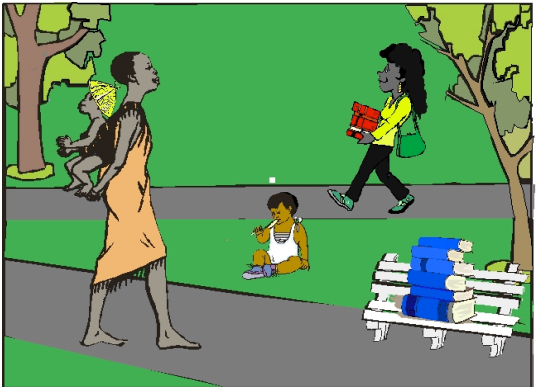

4

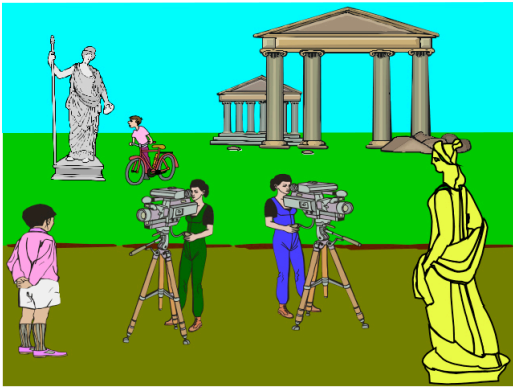

5

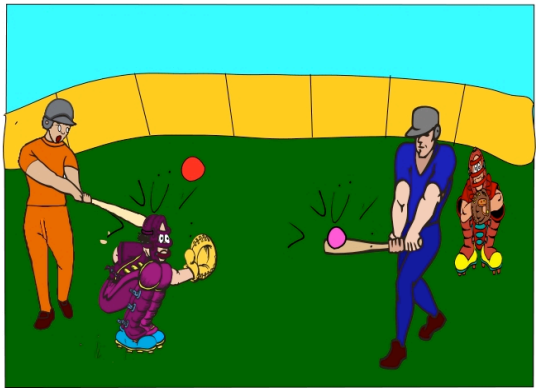

6

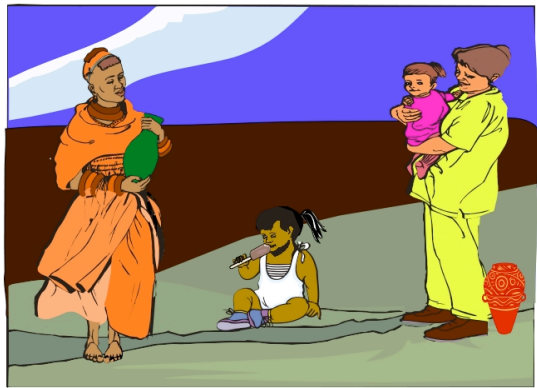

7

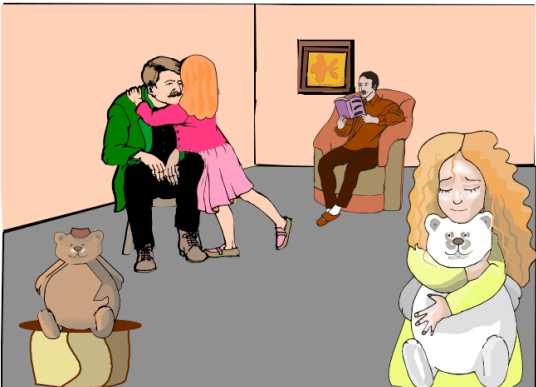

8

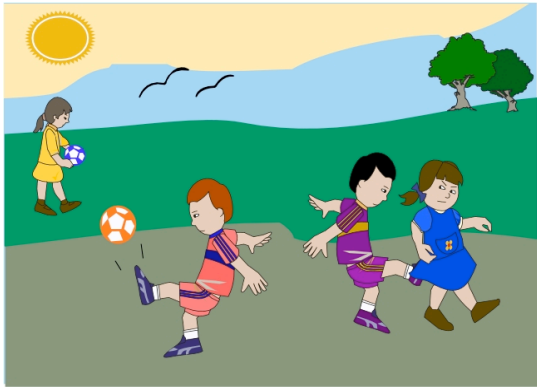

9

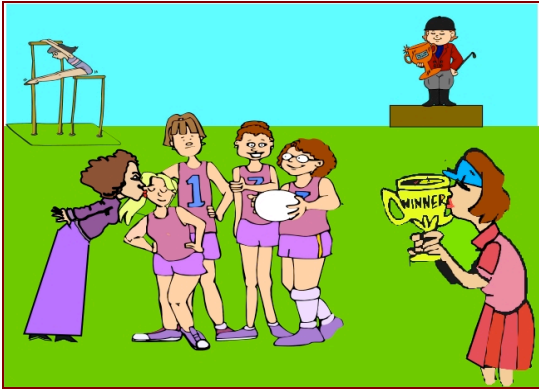

10

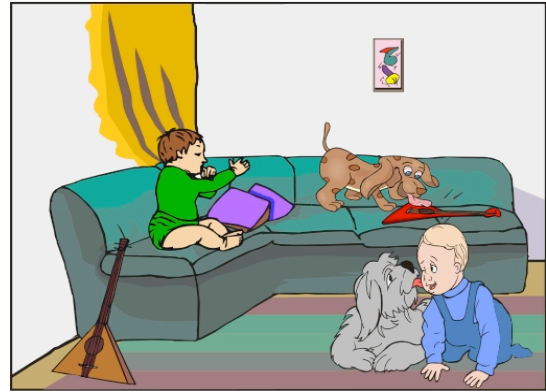

11

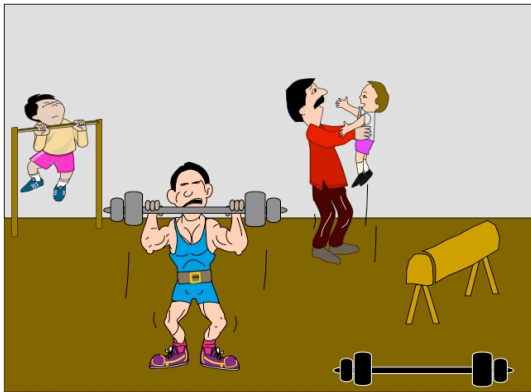

12

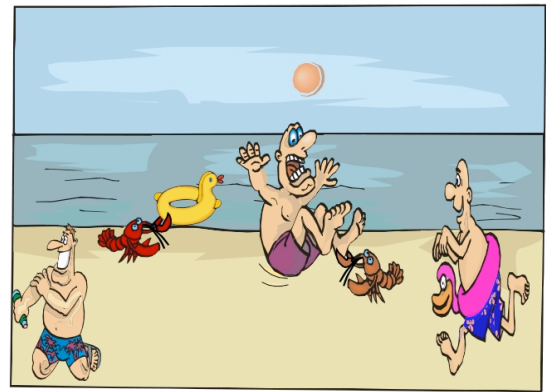

13

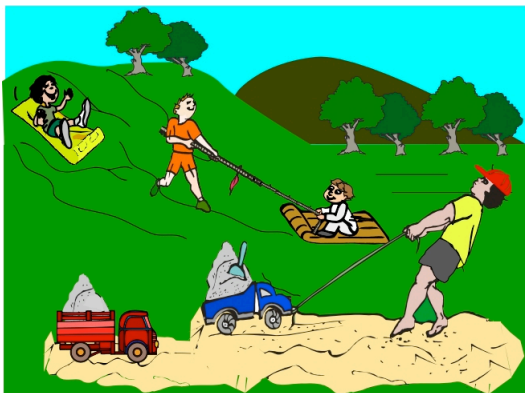

14

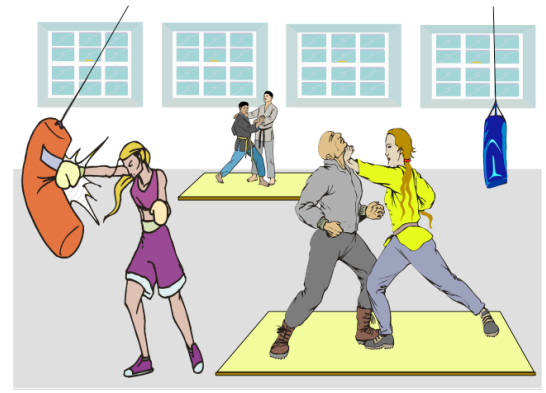

15

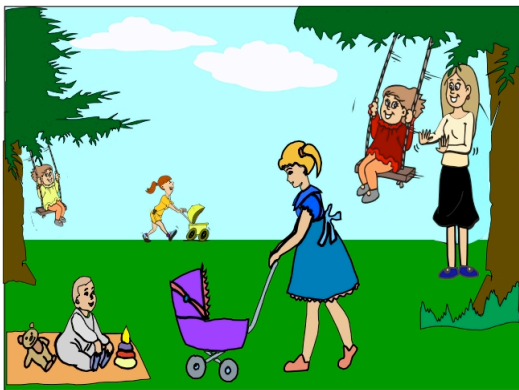

16

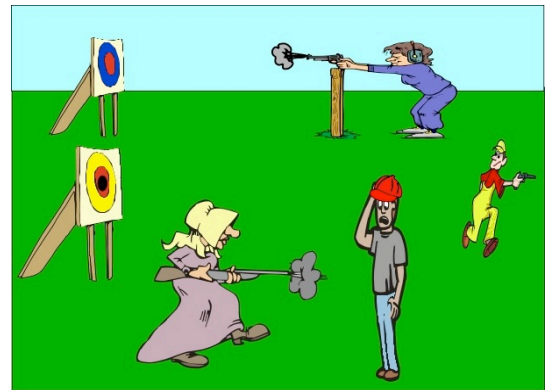

17

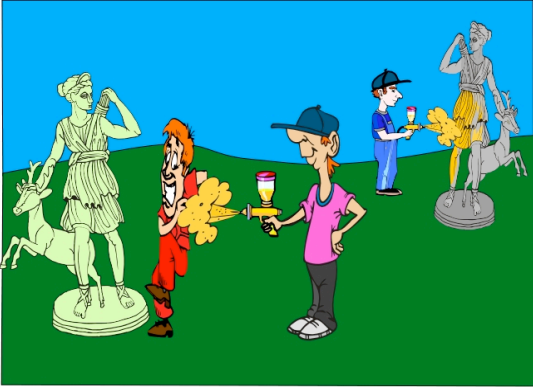

18

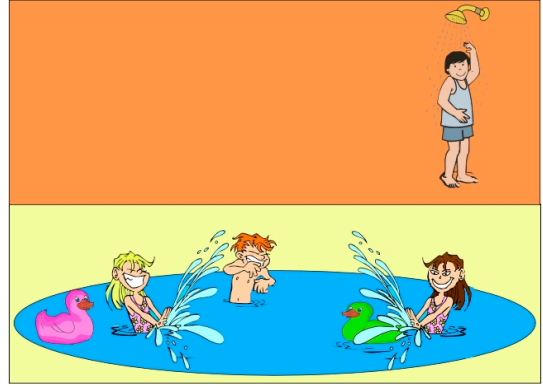

19

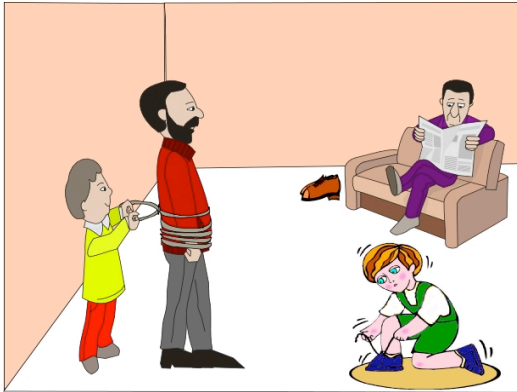

20

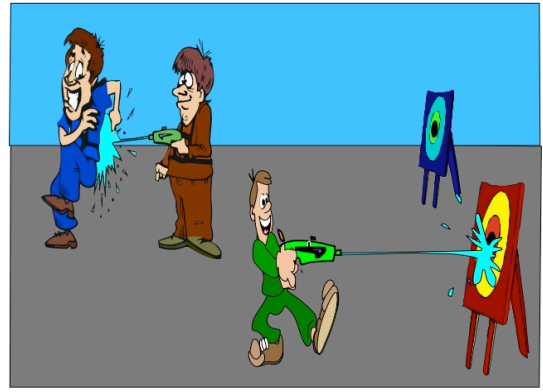

21

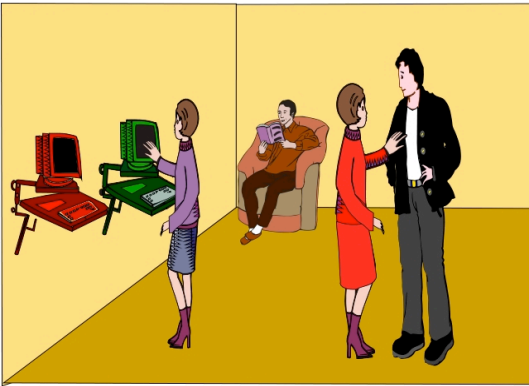

Supplement: NIHMS643267-supplement-Supplementary_Data_1.pdf [file NIHMS643267-supplement-Supplementary_Data_1.pdf]

Appendix 2

1

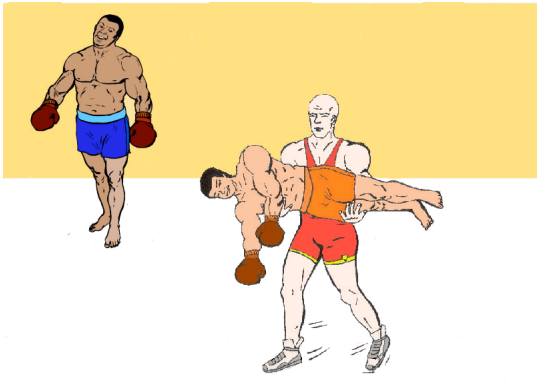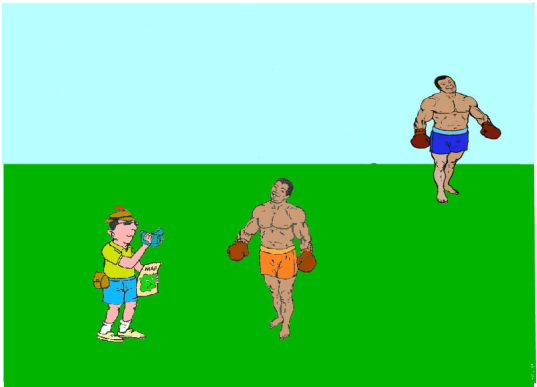

2

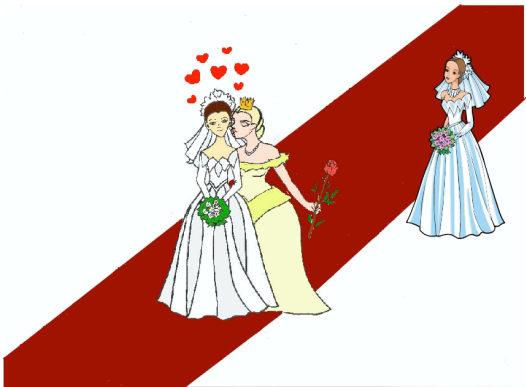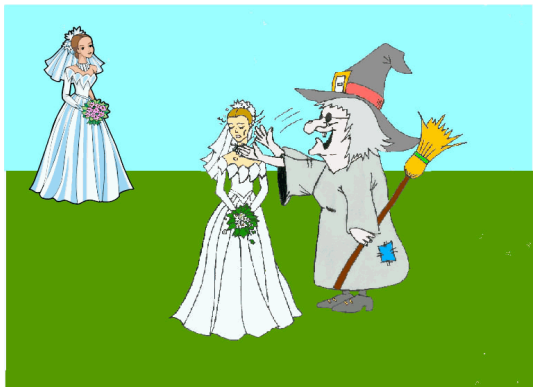

3

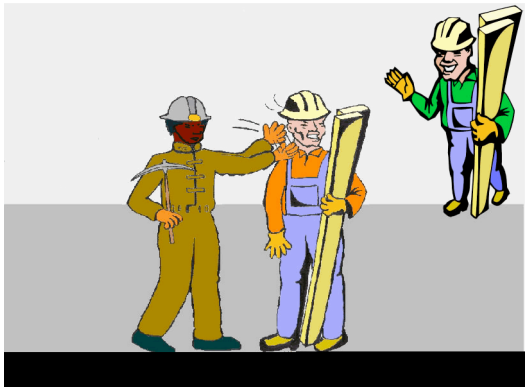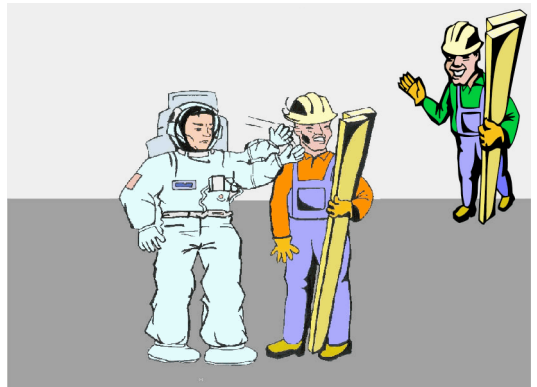

4

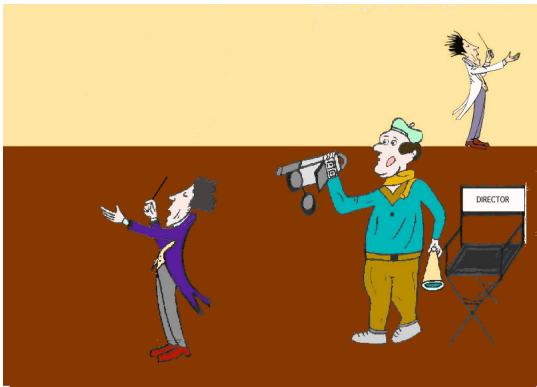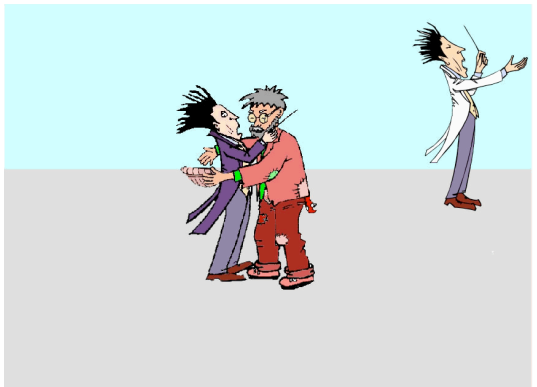

5

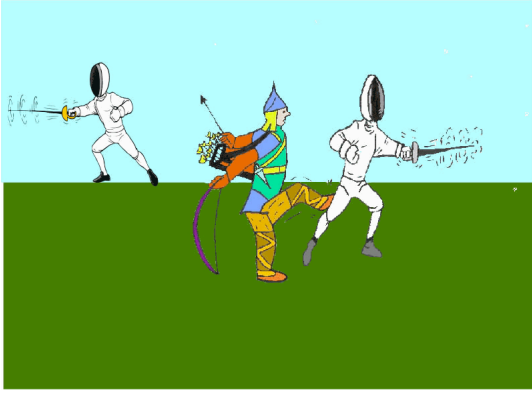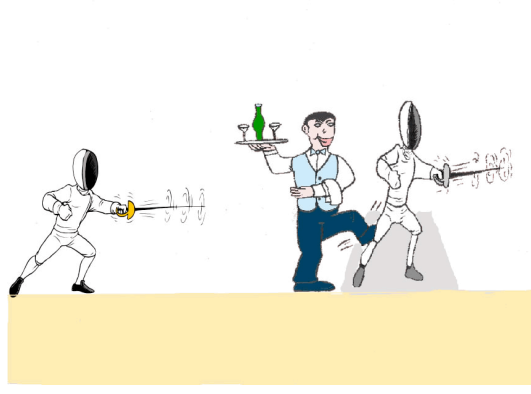

6

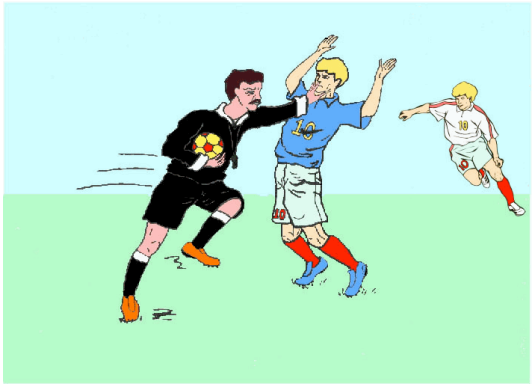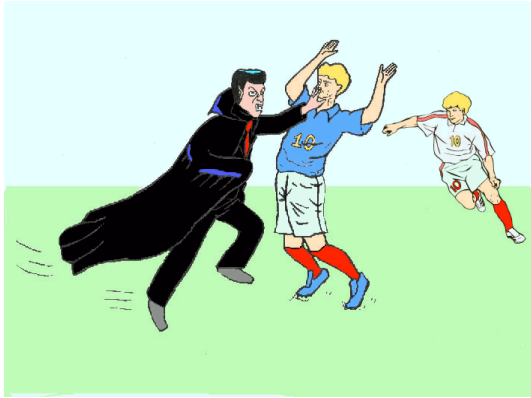

7

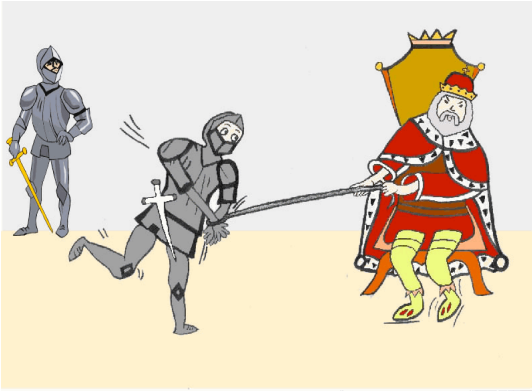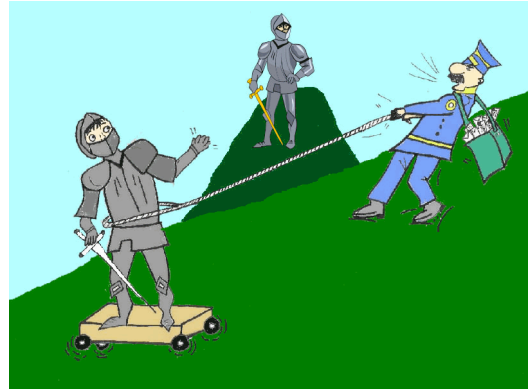

8

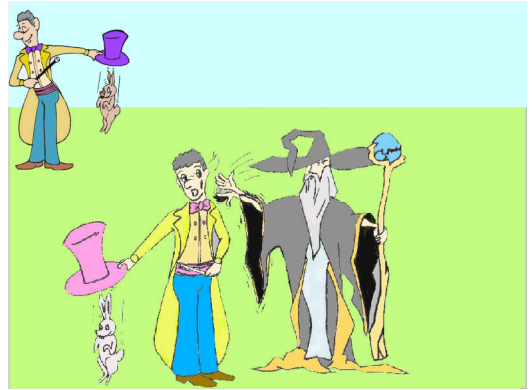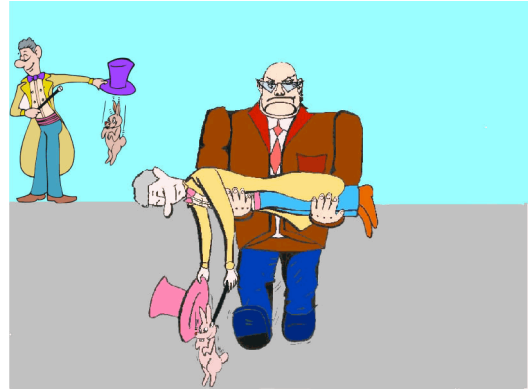

9

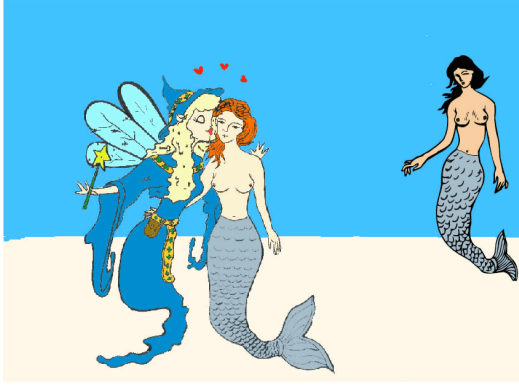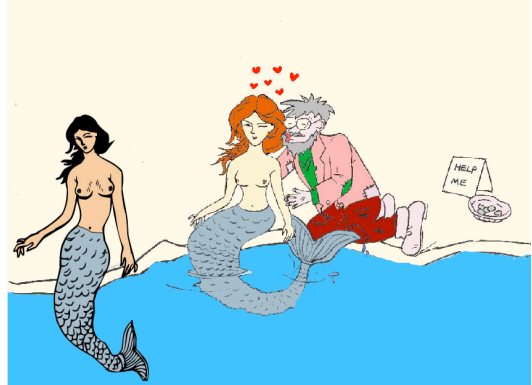

10

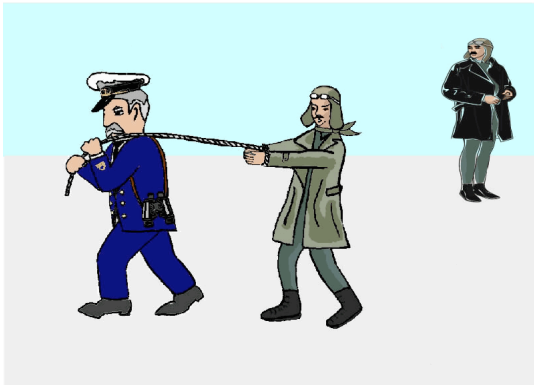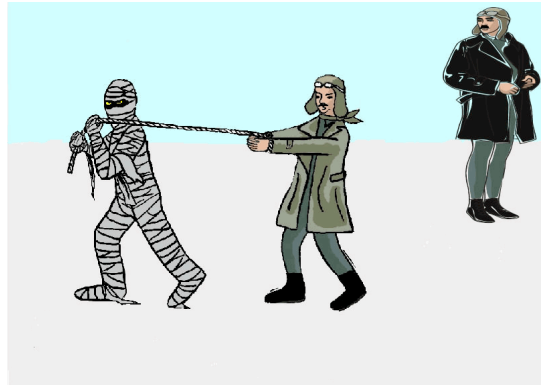

11

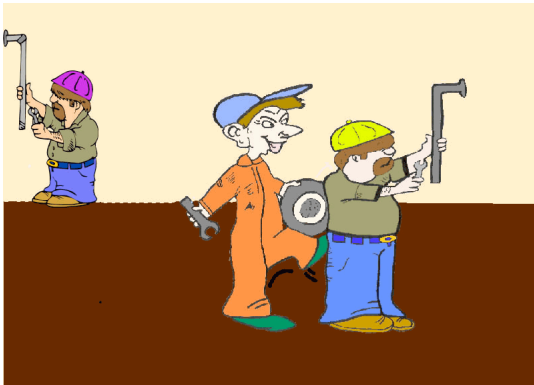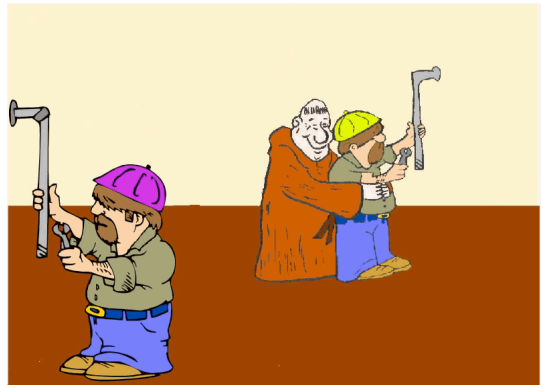

12

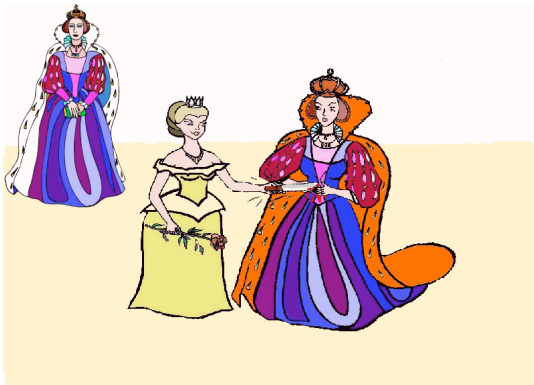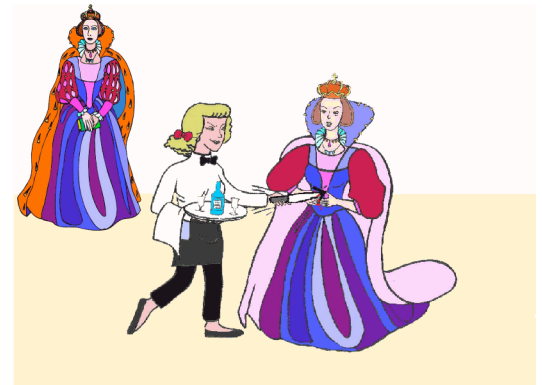

13

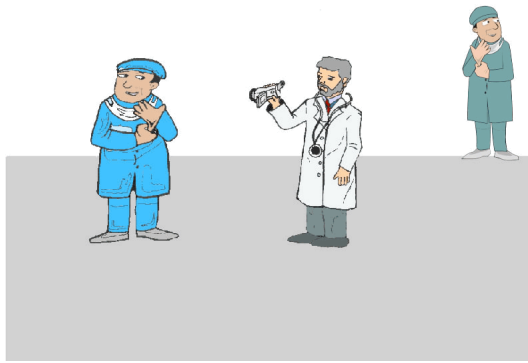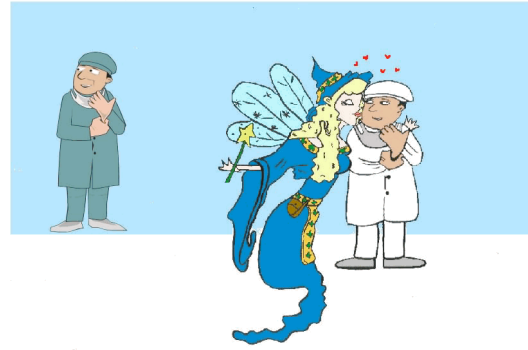

14

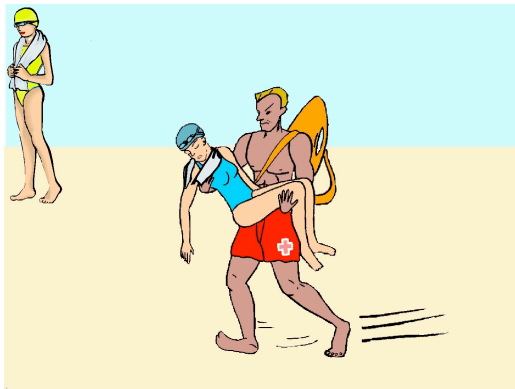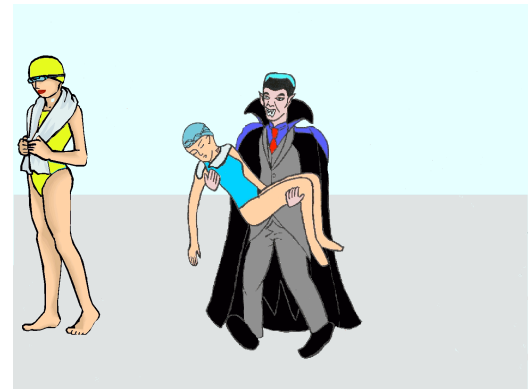

15

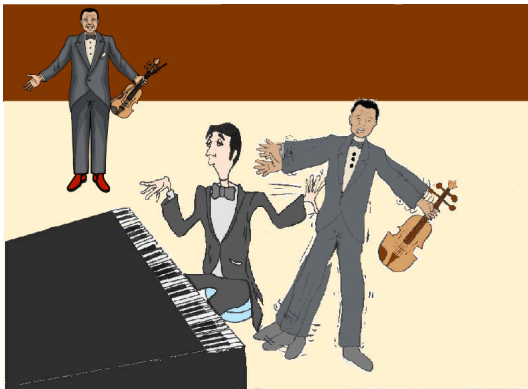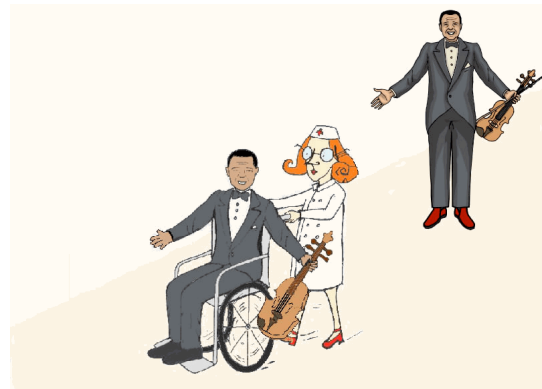

16

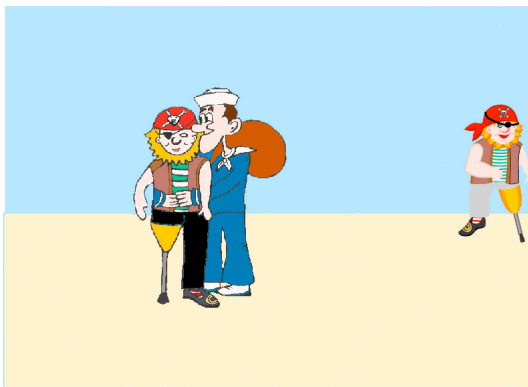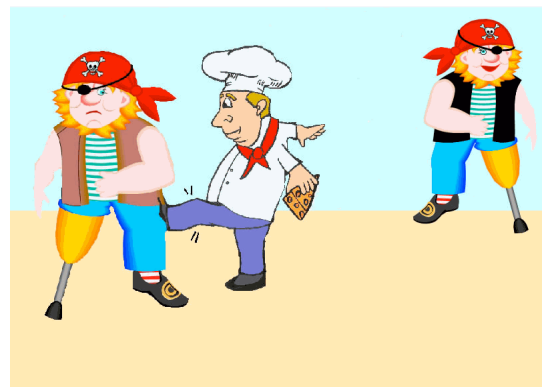

Supplement: NIHMS643267-supplement-Supplementary_Data_2.pdf [file NIHMS643267-supplement-Supplementary_Data_2.pdf]
